# Supplementary material for: Enhancing the stability and performance of Ni-rich cathode materials through Ta doping: a combined theoretical and experimental study
Source: Royal Society of Chemistry journal article supplement (doi:10.1039/d4cp03911d), 2024-12-11
Supplement: d4cp03911d1.pdf [file d4cp03911d1.pdf]

## Enhancing the Stability and Performance of Ni-rich Cathode Materials through Ta Doping: A Combined Theoretical and Experimental Study<sup>†</sup>

Frederike Monsees,<sup>\*a,b</sup> Casimir Misiewicz,<sup>c</sup> Mert Dalkilic,<sup>b</sup> Diddo Diddens<sup>d</sup> and Andreas Heuer<sup>a</sup>

<sup>a</sup> *Institute for Physical Chemistry, University of Münster, Münster*

<sup>b</sup> *PowerCo*

<sup>c</sup> *Department of Chemistry - Ångström Laboratory, Uppsala University, Uppsala*

<sup>d</sup> *Helmholtz Institute Münster (IMD-4), Forschungszentrum Jülich GmbH, Münster*

# 1 Supplemental

Table S1 Oxygen vacancy impact factors

| Oxygen Release Energy, eV | Valence Charge Oxygen | $d_{V_0^x-Ta^y, \text{\AA}}$ | $d_{V_0^x-Li^z, \text{\AA}}$ | $d_{V_0^x-Ni^w, \text{\AA}}$ | $d_{V_0^x-O^v, \text{\AA}}$ | $\bar{d}_{V_0^x-Li^z, \text{\AA}}$ |
|---------------------------|-----------------------|------------------------------|------------------------------|------------------------------|-----------------------------|------------------------------------|
| 2.03                      | -0.96                 | 1.96                         | 4.37                         | 1.91                         | 2.52                        | 5.60                               |
| 2.03                      | -1.03                 | 2.06                         | 2.02                         | 1.90                         | 2.58                        | 5.86                               |
| 2.46                      | -0.96                 | 2.00                         | 3.45                         | 1.88                         | 2.51                        | 5.78                               |
| 2.43                      | -0.91                 | 6.14                         | 2.10                         | 1.89                         | 2.52                        | 4.72                               |
| 1.60                      | -0.90                 | 8.21                         | 2.10                         | 1.89                         | 2.52                        | 4.72                               |
| 1.75                      | -0.90                 | 8.25                         | 2.10                         | 1.89                         | 2.52                        | 4.72                               |
| 2.06                      | -0.90                 | 6.20                         | 2.10                         | 1.89                         | 2.52                        | 4.72                               |
| 2.04                      | -0.90                 | 8.10                         | 2.11                         | 1.89                         | 2.53                        | 4.72                               |
| 2.02                      | -0.90                 | 6.01                         | 2.12                         | 1.89                         | 2.53                        | 4.72                               |
| 2.05                      | -0.93                 | 7.04                         | 2.10                         | 1.88                         | 2.52                        | 4.73                               |
| 2.03                      | -0.91                 | 4.48                         | 2.11                         | 1.88                         | 2.51                        | 4.73                               |
| 2.04                      | -0.84                 | 6.65                         | 3.54                         | 1.88                         | 2.54                        | 4.74                               |
| 2.08                      | -0.71                 | 4.41                         | 4.49                         | 1.87                         | 2.49                        | 5.57                               |
| 2.02                      | -0.84                 | 5.90                         | 2.10                         | 1.87                         | 2.51                        | 5.88                               |
| 2.03                      | -0.76                 | 3.73                         | 3.55                         | 1.86                         | 2.49                        | 5.77                               |
| 2.06                      | -0.76                 | 3.42                         | 3.56                         | 1.88                         | 2.49                        | 5.77                               |
| 1.66                      | -0.84                 | 6.06                         | 2.09                         | 1.87                         | 2.51                        | 5.88                               |
| 1.63                      | -0.84                 | 4.74                         | 2.09                         | 1.87                         | 2.51                        | 5.88                               |
| 2.48                      | -0.74                 | 4.37                         | 3.54                         | 1.88                         | 2.49                        | 5.78                               |
| 2.41                      | -0.83                 | 6.01                         | 3.55                         | 1.89                         | 2.51                        | 4.74                               |
| 2.06                      | -0.75                 | 6.44                         | 3.54                         | 1.86                         | 2.48                        | 5.77                               |
| 2.21                      | -0.76                 | 3.35                         | 3.51                         | 1.86                         | 2.49                        | 5.77                               |
| 2.37                      | -0.73                 | 4.69                         | 4.50                         | 1.87                         | 2.48                        | 5.57                               |
| 2.29                      | -0.85                 | 6.12                         | 2.09                         | 1.87                         | 2.50                        | 5.88                               |
| 1.81                      | -0.83                 | 8.17                         | 3.54                         | 1.89                         | 2.52                        | 4.73                               |
| 1.78                      | -0.73                 | 4.64                         | 4.51                         | 1.87                         | 2.48                        | 5.57                               |
| 2.12                      | -0.83                 | 6.80                         | 3.54                         | 1.89                         | 2.52                        | 4.73                               |
| 1.96                      | -0.85                 | 4.66                         | 2.10                         | 1.87                         | 2.51                        | 5.88                               |
| 2.04                      | -0.74                 | 5.83                         | 3.54                         | 1.86                         | 2.48                        | 5.77                               |
| 2.06                      | -0.74                 | 4.62                         | 3.55                         | 1.86                         | 2.48                        | 5.77                               |
| 2.12                      | -0.85                 | 4.37                         | 2.09                         | 1.87                         | 2.51                        | 5.87                               |
| 2.85                      | -0.83                 | 4.47                         | 2.13                         | 1.88                         | 2.48                        | 5.27                               |
| 2.62                      | -0.88                 | 3.56                         | 2.03                         | 1.86                         | 2.48                        | 5.26                               |
| 2.08                      | -0.87                 | 5.91                         | 2.03                         | 1.86                         | 2.48                        | 5.26                               |
| 1.81                      | -0.83                 | 4.48                         | 2.10                         | 1.86                         | 2.52                        | 5.88                               |
| 2.67                      | -0.85                 | 6.50                         | 2.11                         | 1.87                         | 2.48                        | 5.27                               |
| 1.92                      | -0.84                 | 8.06                         | 2.13                         | 1.88                         | 2.50                        | 5.27                               |
| 1.94                      | -0.84                 | 4.70                         | 2.13                         | 1.88                         | 2.50                        | 5.27                               |
| 2.32                      | -0.86                 | 6.53                         | 2.10                         | 1.88                         | 2.50                        | 5.27                               |
| 2.24                      | -0.86                 | 6.66                         | 2.11                         | 1.88                         | 2.50                        | 5.27                               |

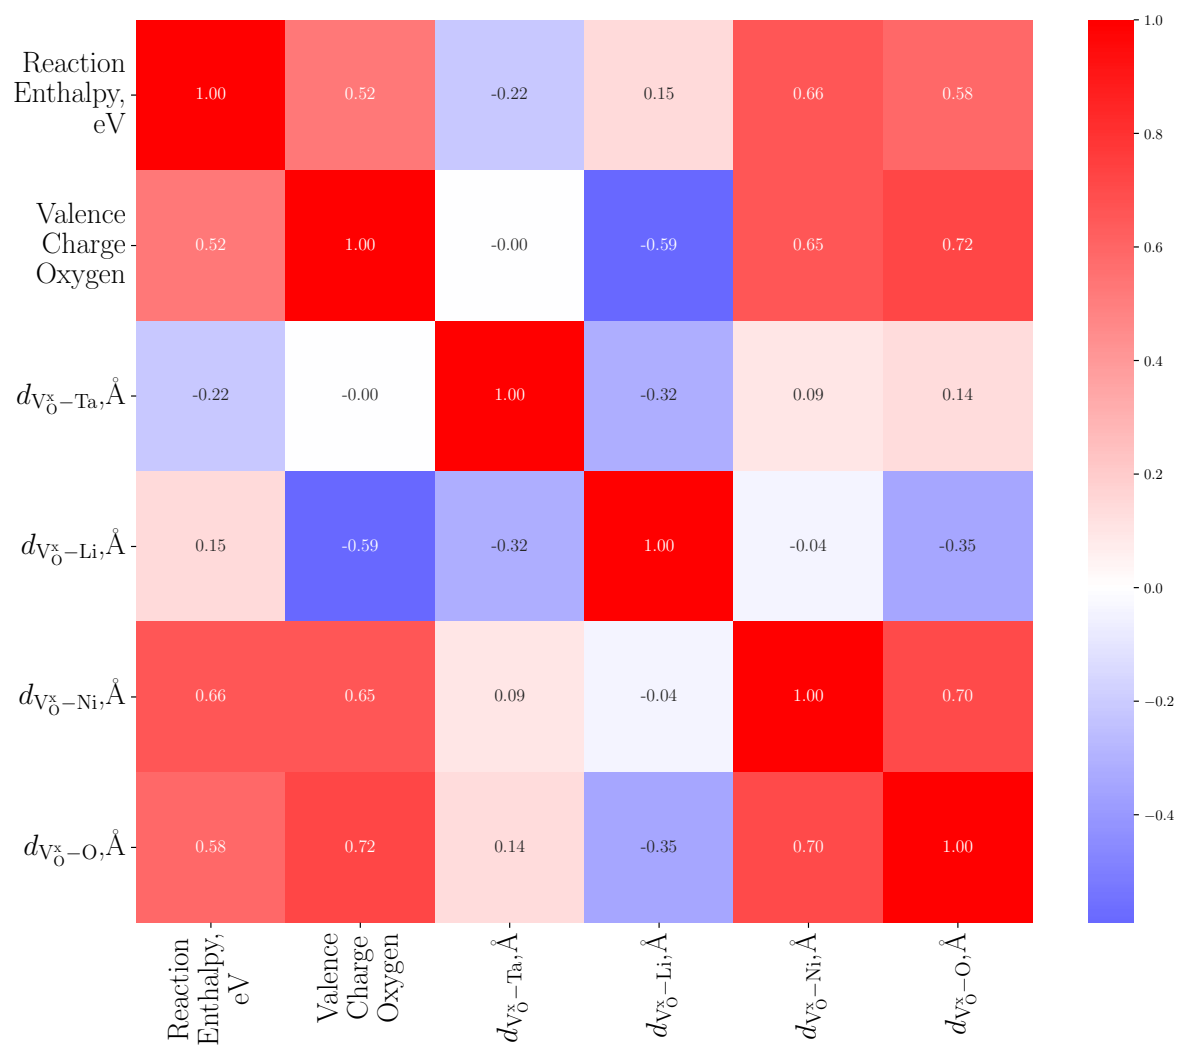

Fig. S1 Correlation matrix of oxygen vacancy impact factors.

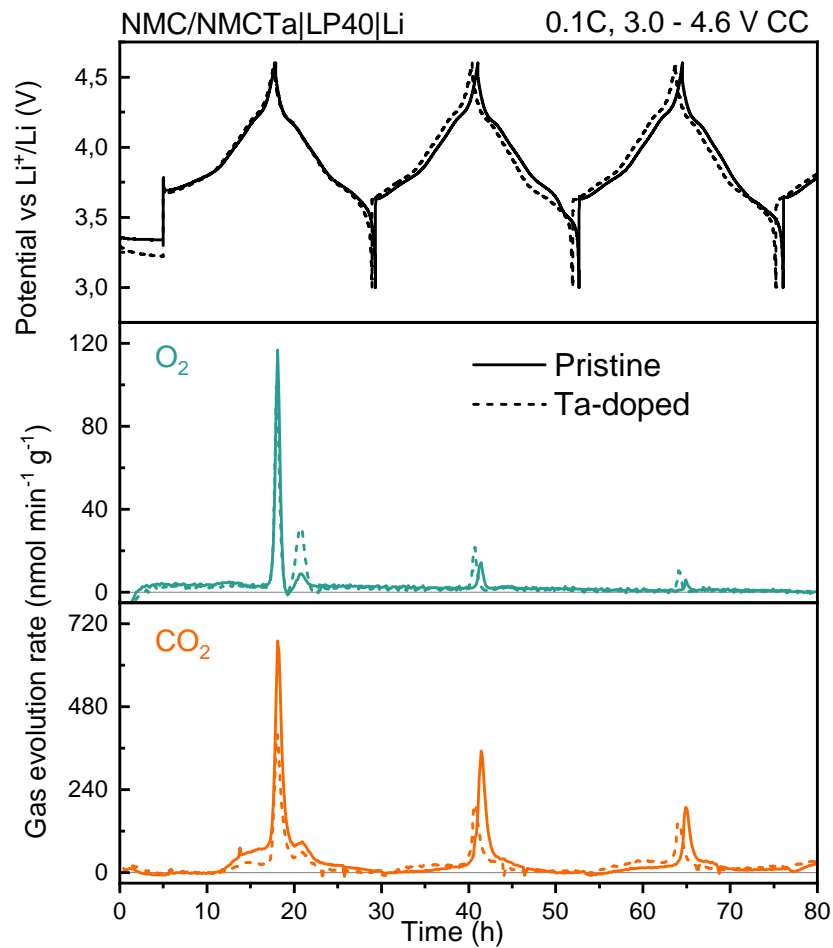

Fig. S2 Extended gas evolution profiles for O<sub>2</sub> and CO<sub>2</sub> during cycling of pristine and Ta-doped NMC811

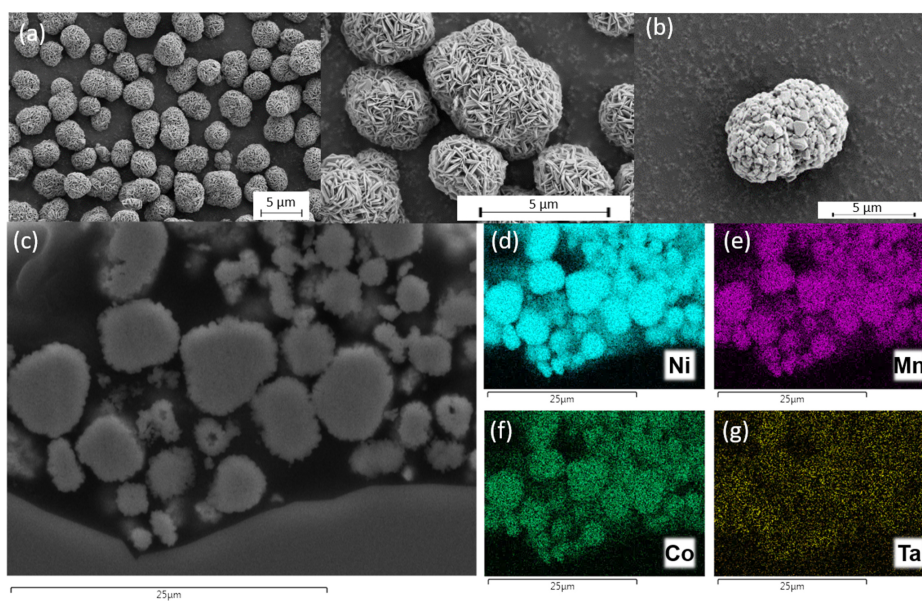

Fig. S3 SEM characterization of Ta-doped samples (reprinted from [2], DOI: 10.1149/1945-7111/ac8a1b) with permission)

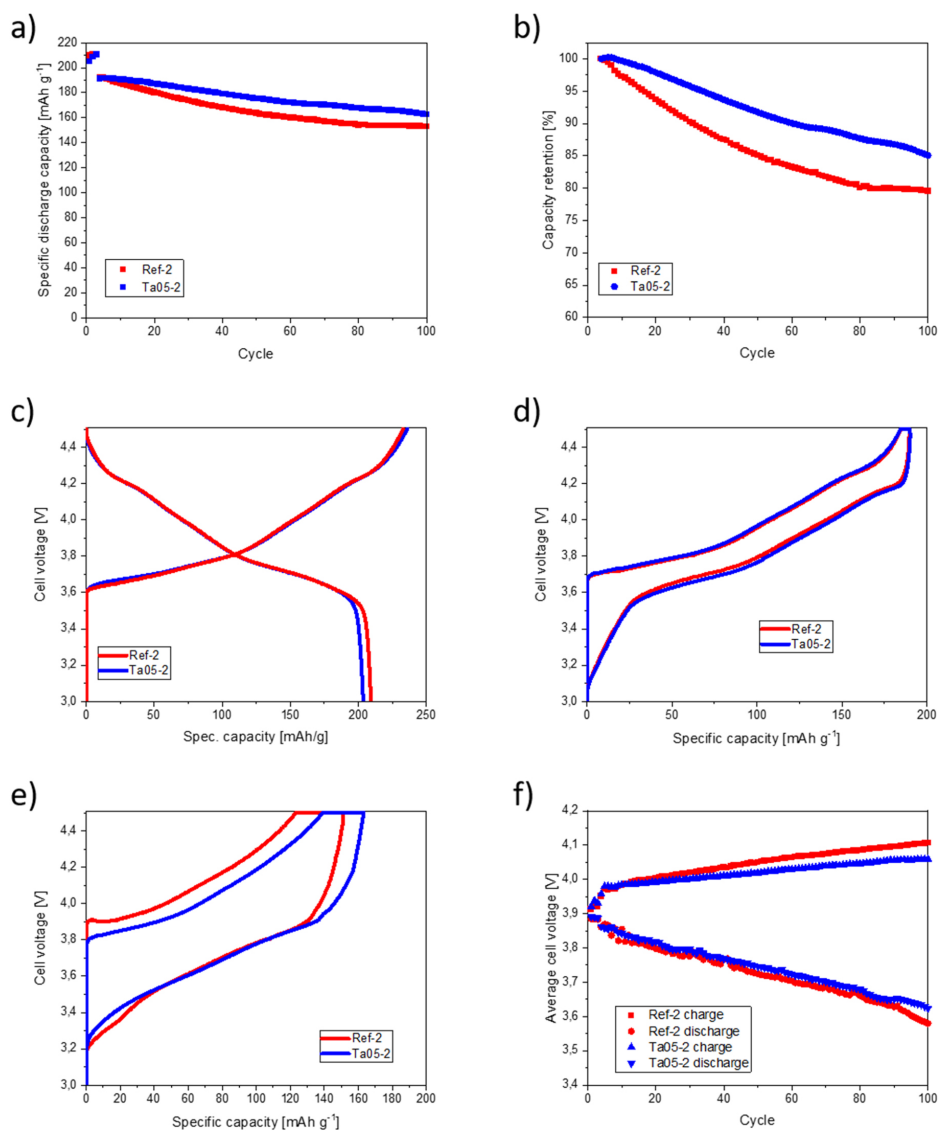

Fig. S4 Electrochemical performance comparison of 0.5 mol% Ta-doped vs. pristine samples: discharge capacity, capacity retention, and voltage profiles (reprinted from [? ,DOI: 10.1149/1945-7111/ ac8a1b] with permission)

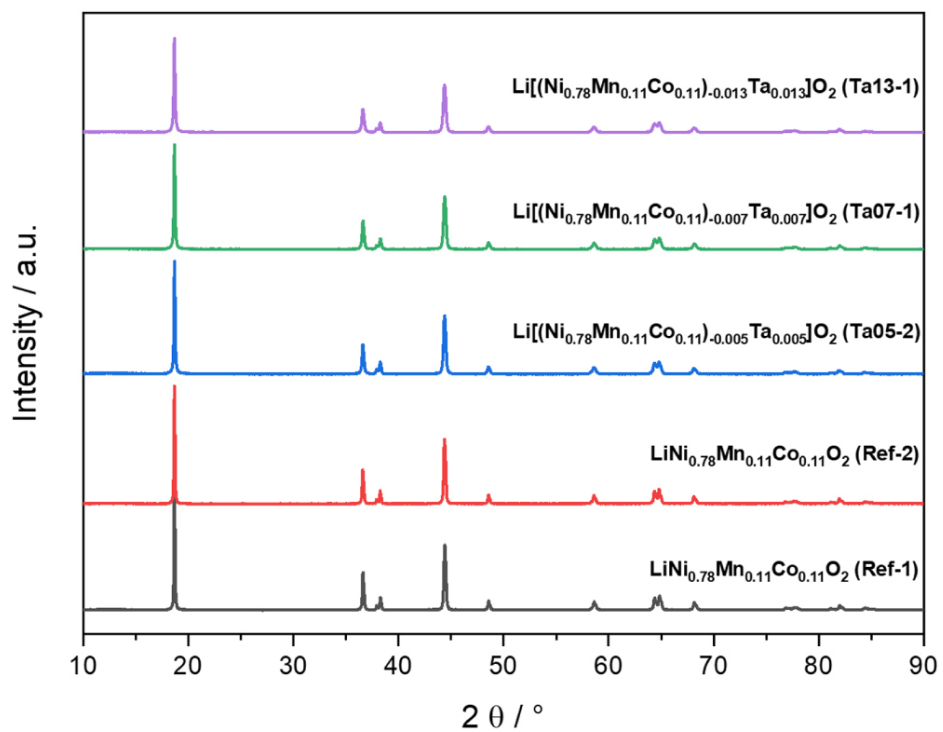

Fig. S5 X-ray powder diffraction patterns of Ta-doped and undoped samples (reprinted from [?], DOI: 10.1149/1945-7111/ac8a1b] with permission)

Table S2 Training structures for the transition metal sublattice

| no | Ni   | Co   | Mn   | E <sub>DFT</sub> | E <sub>CE</sub> | Dist to GSL<br>meV/f.u. | cell formula                                                                     | space group             |
|----|------|------|------|------------------|-----------------|-------------------------|----------------------------------------------------------------------------------|-------------------------|
| 1  | 0.00 | 0.00 | 1.00 | -21.80           | -21.80          | 0.000                   | LiMnO <sub>2</sub>                                                               | <i>R-3m</i>             |
| 2  | 0.00 | 0.11 | 0.89 | -21.51           | -21.55          | 0.020                   | Li <sub>9</sub> Mn <sub>8</sub> CoO <sub>18</sub>                                | <i>R-3</i>              |
| 3  | 0.00 | 0.11 | 0.89 | -21.53           | -21.55          | 0.000                   | Li <sub>9</sub> Mn <sub>8</sub> CoO <sub>18</sub>                                | <i>P-1</i>              |
| 4  | 0.00 | 0.13 | 0.88 | -21.50           | -21.52          | 0.002                   | Li <sub>8</sub> Mn <sub>7</sub> CoO <sub>16</sub>                                | <i>C2/m</i>             |
| 5  | 0.00 | 0.14 | 0.86 | -21.44           | -21.45          | 0.012                   | Li <sub>7</sub> Mn <sub>6</sub> CoO <sub>14</sub>                                | <i>C2/m</i>             |
| 6  | 0.00 | 0.14 | 0.86 | -21.45           | -21.45          | 0.004                   | Li <sub>7</sub> Mn <sub>6</sub> CoO <sub>14</sub>                                | <i>C2/m</i>             |
| 7  | 0.00 | 0.17 | 0.83 | -21.39           | -21.43          | 0.009                   | Li <sub>6</sub> Mn <sub>5</sub> CoO <sub>12</sub>                                | <i>P2/m</i>             |
| 8  | 0.00 | 0.20 | 0.80 | -21.30           | -21.33          | 0.014                   | Li <sub>10</sub> Mn <sub>8</sub> Co <sub>2</sub> O <sub>20</sub>                 | <i>P-1</i>              |
| 9  | 0.00 | 0.20 | 0.80 | -21.30           | -21.35          | 0.010                   | Li <sub>10</sub> Mn <sub>8</sub> Co <sub>2</sub> O <sub>20</sub>                 | <i>P2/m</i>             |
| 10 | 0.00 | 0.20 | 0.80 | -21.31           | -21.30          | 0.000                   | Li <sub>5</sub> Mn <sub>4</sub> CoO <sub>10</sub>                                | <i>R-3m</i>             |
| 11 | 0.00 | 0.29 | 0.71 | -21.09           | -21.07          | 0.010                   | Li <sub>7</sub> Mn <sub>5</sub> Co <sub>2</sub> O <sub>14</sub>                  | <i>C2/m</i>             |
| 12 | 0.00 | 0.38 | 0.63 | -20.86           | -20.88          | 0.023                   | Li <sub>8</sub> Mn <sub>5</sub> Co <sub>3</sub> O <sub>16</sub>                  | <i>P1</i>               |
| 13 | 0.00 | 0.40 | 0.60 | -20.80           | -20.74          | 0.021                   | Li <sub>10</sub> Mn <sub>6</sub> Co <sub>4</sub> O <sub>20</sub>                 | <i>P-1</i>              |
| 14 | 0.00 | 0.43 | 0.57 | -20.73           | -20.67          | 0.020                   | Li <sub>7</sub> Mn <sub>4</sub> Co <sub>3</sub> O <sub>14</sub>                  | <i>C2/m</i>             |
| 15 | 0.00 | 0.44 | 0.56 | -20.71           | -20.66          | 0.000                   | Li <sub>9</sub> Mn <sub>5</sub> Co <sub>4</sub> O <sub>18</sub>                  | <i>P-3m1</i>            |
| 16 | 0.00 | 0.50 | 0.50 | -20.54           | -20.51          | 0.033                   | Li <sub>8</sub> Mn <sub>4</sub> Co <sub>4</sub> O <sub>16</sub>                  | <i>C2/c</i>             |
| 17 | 0.00 | 0.50 | 0.50 | -20.55           | -20.52          | 0.029                   | Li <sub>10</sub> Mn <sub>5</sub> Co <sub>5</sub> O <sub>20</sub>                 | <i>C2</i>               |
| 18 | 0.00 | 0.56 | 0.44 | -20.41           | -20.39          | 0.030                   | Li <sub>9</sub> Mn <sub>4</sub> Co <sub>5</sub> O <sub>18</sub>                  | <i>P-1</i>              |
| 19 | 0.00 | 0.57 | 0.43 | -20.37           | -20.34          | 0.024                   | Li <sub>7</sub> Mn <sub>3</sub> Co <sub>4</sub> O <sub>14</sub>                  | <i>C2/m</i>             |
| 20 | 0.00 | 0.60 | 0.40 | -20.28           | -20.22          | 0.044                   | Li <sub>5</sub> Mn <sub>2</sub> Co <sub>3</sub> O <sub>10</sub>                  | <i>C2/m</i>             |
| 21 | 0.00 | 0.60 | 0.40 | -20.28           | -20.26          | 0.043                   | Li <sub>10</sub> Mn <sub>4</sub> Co <sub>6</sub> O <sub>20</sub>                 | <i>C2/m</i>             |
| 22 | 0.00 | 0.60 | 0.40 | -20.31           | -20.31          | 0.019                   | Li <sub>10</sub> Mn <sub>4</sub> Co <sub>6</sub> O <sub>20</sub>                 | <i>P2<sub>1</sub>/m</i> |
| 23 | 0.00 | 0.63 | 0.38 | -20.23           | -20.23          | 0.038                   | Li <sub>8</sub> Mn <sub>3</sub> Co <sub>5</sub> O <sub>16</sub>                  | <i>P-1</i>              |
| 24 | 0.00 | 0.63 | 0.38 | -20.24           | -20.18          | 0.020                   | Li <sub>8</sub> Mn <sub>3</sub> Co <sub>5</sub> O <sub>16</sub>                  | <i>C2/m</i>             |
| 25 | 0.00 | 0.67 | 0.33 | -20.12           | -20.10          | 0.044                   | Li <sub>9</sub> Mn <sub>3</sub> Co <sub>6</sub> O <sub>18</sub>                  | <i>P-1</i>              |
| 26 | 0.00 | 0.70 | 0.30 | -20.05           | -20.00          | 0.029                   | Li <sub>10</sub> Mn <sub>3</sub> Co <sub>7</sub> O <sub>20</sub>                 | <i>P2/m</i>             |
| 27 | 0.00 | 0.75 | 0.25 | -19.90           | -19.88          | 0.054                   | Li <sub>8</sub> Mn <sub>2</sub> Co <sub>6</sub> O <sub>16</sub>                  | <i>C2/c</i>             |
| 28 | 0.00 | 0.75 | 0.25 | -19.94           | -19.86          | 0.015                   | Li <sub>8</sub> Mn <sub>2</sub> Co <sub>6</sub> O <sub>16</sub>                  | <i>C2/m</i>             |
| 29 | 0.00 | 0.78 | 0.22 | -19.81           | -19.83          | 0.079                   | Li <sub>9</sub> Mn <sub>2</sub> Co <sub>7</sub> O <sub>18</sub>                  | <i>C2/m</i>             |
| 30 | 0.00 | 0.83 | 0.17 | -19.72           | -19.72          | 0.033                   | Li <sub>6</sub> MnCo <sub>5</sub> O <sub>12</sub>                                | <i>P-1</i>              |
| 31 | 0.00 | 0.83 | 0.17 | -19.75           | -19.67          | 0.000                   | Li <sub>6</sub> MnCo <sub>5</sub> O <sub>12</sub>                                | <i>P-3m1</i>            |
| 32 | 0.00 | 0.86 | 0.14 | -19.18           | -19.63          | 0.513                   | Li <sub>7</sub> MnCo <sub>6</sub> O <sub>14</sub>                                | <i>R-3m</i>             |
| 33 | 0.00 | 0.90 | 0.10 | -19.57           | -19.58          | 0.011                   | Li <sub>10</sub> MnCo <sub>9</sub> O <sub>20</sub>                               | <i>C2/m</i>             |
| 34 | 0.00 | 1.00 | 0.00 | -19.33           | -19.33          | 0.000                   | LiCoO <sub>2</sub>                                                               | <i>R-3m</i>             |
| 35 | 0.10 | 0.20 | 0.70 | -20.86           | -20.84          | 0.009                   | Li <sub>10</sub> Mn <sub>7</sub> Co <sub>2</sub> NiO <sub>20</sub>               | <i>C2/m</i>             |
| 36 | 0.10 | 0.40 | 0.50 | -20.30           | -20.28          | 0.073                   | Li <sub>10</sub> Mn <sub>5</sub> Co <sub>4</sub> NiO <sub>20</sub>               | <i>Cm</i>               |
| 37 | 0.10 | 0.40 | 0.50 | -20.34           | -20.33          | 0.032                   | Li <sub>10</sub> Mn <sub>5</sub> Co <sub>4</sub> NiO <sub>20</sub>               | <i>P1</i>               |
| 38 | 0.10 | 0.50 | 0.40 | -20.08           | -20.10          | 0.041                   | Li <sub>10</sub> Mn <sub>4</sub> Co <sub>5</sub> NiO <sub>20</sub>               | <i>P1</i>               |
| 39 | 0.10 | 0.70 | 0.20 | -19.61           | -19.58          | 0.018                   | Li <sub>10</sub> Mn <sub>2</sub> Co <sub>7</sub> NiO <sub>20</sub>               | <i>P2/m</i>             |
| 40 | 0.10 | 0.70 | 0.20 | -19.62           | -19.60          | 0.011                   | Li <sub>10</sub> Mn <sub>2</sub> Co <sub>7</sub> NiO <sub>20</sub>               | <i>P2/m</i>             |
| 41 | 0.10 | 0.80 | 0.10 | -19.35           | -19.33          | 0.020                   | Li <sub>10</sub> MnCo <sub>8</sub> NiO <sub>20</sub>                             | <i>P-1</i>              |
| 42 | 0.10 | 0.80 | 0.10 | -19.36           | -19.34          | 0.013                   | Li <sub>10</sub> MnCo <sub>8</sub> NiO <sub>20</sub>                             | <i>P2/m</i>             |
| 43 | 0.10 | 0.90 | 0.00 | -19.06           | -19.05          | 0.009                   | Li <sub>10</sub> Co <sub>9</sub> NiO <sub>20</sub>                               | <i>P-1</i>              |
| 44 | 0.10 | 0.90 | 0.00 | -19.06           | -19.06          | 0.006                   | Li <sub>10</sub> Co <sub>9</sub> NiO <sub>20</sub>                               | <i>P-1</i>              |
| 45 | 0.11 | 0.00 | 0.89 | -21.31           | -21.32          | 0.000                   | Li <sub>9</sub> Mn <sub>8</sub> NiO <sub>18</sub>                                | <i>C2/m</i>             |
| 46 | 0.11 | 0.11 | 0.78 | -21.03           | -21.03          | 0.007                   | Li <sub>9</sub> Mn <sub>7</sub> CoNiO <sub>18</sub>                              | <i>P1</i>               |
| 47 | 0.11 | 0.33 | 0.56 | -20.47           | -20.49          | 0.017                   | Li <sub>9</sub> Mn <sub>5</sub> Co <sub>3</sub> NiO <sub>18</sub>                | <i>P1</i>               |
| 48 | 0.11 | 0.89 | 0.00 | -19.03           | -19.01          | 0.011                   | Li <sub>9</sub> Co <sub>8</sub> NiO <sub>18</sub>                                | <i>C2/m</i>             |
| 49 | 0.11 | 0.89 | 0.00 | -19.03           | -19.03          | 0.002                   | Li <sub>9</sub> Co <sub>8</sub> NiO <sub>18</sub>                                | <i>C2/m</i>             |
| 50 | 0.13 | 0.00 | 0.88 | -21.25           | -21.21          | 0.001                   | Li <sub>8</sub> Mn <sub>7</sub> NiO <sub>16</sub>                                | <i>P-1</i>              |
| 51 | 0.13 | 0.13 | 0.75 | -20.92           | -20.94          | 0.016                   | Li <sub>8</sub> Mn <sub>6</sub> CoNiO <sub>16</sub>                              | <i>C2/m</i>             |
| 52 | 0.13 | 0.75 | 0.13 | -19.36           | -19.34          | 0.016                   | Li <sub>8</sub> MnCo <sub>6</sub> NiO <sub>16</sub>                              | <i>C2/m</i>             |
| 53 | 0.14 | 0.43 | 0.43 | -20.07           | -20.10          | 0.039                   | Li <sub>7</sub> Mn <sub>3</sub> Co <sub>3</sub> NiO <sub>14</sub>                | <i>P1</i>               |
| 54 | 0.14 | 0.71 | 0.14 | -19.36           | -19.33          | 0.028                   | Li <sub>7</sub> MnCo <sub>5</sub> NiO <sub>14</sub>                              | <i>P1</i>               |
| 55 | 0.14 | 0.86 | 0.00 | -18.94           | -18.92          | 0.012                   | Li <sub>7</sub> Co <sub>6</sub> NiO <sub>14</sub>                                | <i>P-1</i>              |
| 56 | 0.17 | 0.00 | 0.83 | -21.06           | -21.08          | 0.002                   | Li <sub>6</sub> Mn <sub>5</sub> NiO <sub>12</sub>                                | <i>P-1</i>              |
| 57 | 0.17 | 0.17 | 0.67 | -20.65           | -20.66          | 0.000                   | Li <sub>6</sub> Mn <sub>4</sub> CoNiO <sub>12</sub>                              | <i>P-1</i>              |
| 58 | 0.17 | 0.33 | 0.50 | -20.21           | -20.18          | 0.026                   | Li <sub>6</sub> Mn <sub>3</sub> Co <sub>2</sub> NiO <sub>12</sub>                | <i>P-1</i>              |
| 59 | 0.17 | 0.50 | 0.33 | -19.78           | -19.79          | 0.039                   | Li <sub>6</sub> Mn <sub>2</sub> Co <sub>3</sub> NiO <sub>12</sub>                | <i>P1</i>               |
| 60 | 0.17 | 0.83 | 0.00 | -18.88           | -18.86          | 0.007                   | Li <sub>6</sub> Co <sub>5</sub> NiO <sub>12</sub>                                | <i>C2/m</i>             |
| 61 | 0.20 | 0.40 | 0.40 | -19.90           | -19.92          | 0.020                   | Li <sub>10</sub> Mn <sub>4</sub> Co <sub>4</sub> Ni <sub>2</sub> O <sub>20</sub> | <i>C2/c</i>             |
| 62 | 0.20 | 0.50 | 0.30 | -19.61           | -19.58          | 0.053                   | Li <sub>10</sub> Mn <sub>3</sub> Co <sub>5</sub> Ni <sub>2</sub> O <sub>20</sub> | <i>P1</i>               |
| 63 | 0.20 | 0.80 | 0.00 | -18.79           | -18.79          | 0.005                   | Li <sub>10</sub> Co <sub>8</sub> Ni <sub>2</sub> O <sub>20</sub>                 | <i>C2/m</i>             |
| 64 | 0.22 | 0.00 | 0.78 | -20.81           | -20.80          | 0.000                   | Li <sub>9</sub> Mn <sub>7</sub> Ni <sub>2</sub> O <sub>18</sub>                  | <i>C2/m</i>             |

| no  | Ni   | Co   | Mn   | E <sub>DFT</sub> | E <sub>CE</sub> | Dist to GSL<br>meV/f.u. | cell formula                                                                     | space group |
|-----|------|------|------|------------------|-----------------|-------------------------|----------------------------------------------------------------------------------|-------------|
| 65  | 0.22 | 0.33 | 0.44 | -19.96           | -19.98          | 0.026                   | Li <sub>9</sub> Mn <sub>4</sub> Co <sub>3</sub> Ni <sub>2</sub> O <sub>18</sub>  | <i>P-1</i>  |
| 66  | 0.22 | 0.33 | 0.44 | -19.96           | -19.98          | 0.024                   | Li <sub>9</sub> Mn <sub>4</sub> Co <sub>3</sub> Ni <sub>2</sub> O <sub>18</sub>  | <i>P-1</i>  |
| 67  | 0.22 | 0.33 | 0.44 | -19.96           | -19.94          | 0.023                   | Li <sub>9</sub> Mn <sub>4</sub> Co <sub>3</sub> Ni <sub>2</sub> O <sub>18</sub>  | <i>C2/m</i> |
| 68  | 0.22 | 0.33 | 0.44 | -19.99           | -19.97          | 0.001                   | Li <sub>9</sub> Mn <sub>4</sub> Co <sub>3</sub> Ni <sub>2</sub> O <sub>18</sub>  | <i>P-1</i>  |
| 69  | 0.22 | 0.44 | 0.33 | -19.68           | -19.72          | 0.016                   | Li <sub>9</sub> Mn <sub>3</sub> Co <sub>4</sub> Ni <sub>2</sub> O <sub>18</sub>  | <i>C2</i>   |
| 70  | 0.22 | 0.56 | 0.22 | -19.39           | -19.38          | 0.020                   | Li <sub>9</sub> Mn <sub>2</sub> Co <sub>5</sub> Ni <sub>2</sub> O <sub>18</sub>  | <i>P-1</i>  |
| 71  | 0.22 | 0.67 | 0.11 | -19.06           | -19.07          | 0.020                   | Li <sub>9</sub> MnCo <sub>6</sub> Ni <sub>2</sub> O <sub>18</sub>                | <i>C2/m</i> |
| 72  | 0.22 | 0.78 | 0.00 | -18.73           | -18.68          | 0.009                   | Li <sub>9</sub> Co <sub>7</sub> Ni <sub>2</sub> O <sub>18</sub>                  | <i>C2/m</i> |
| 73  | 0.22 | 0.78 | 0.00 | -18.73           | -18.74          | 0.005                   | Li <sub>9</sub> Co <sub>7</sub> Ni <sub>2</sub> O <sub>18</sub>                  | <i>C2/m</i> |
| 74  | 0.22 | 0.78 | 0.00 | -18.74           | -18.75          | 0.000                   | Li <sub>9</sub> Co <sub>7</sub> Ni <sub>2</sub> O <sub>18</sub>                  | <i>C2/m</i> |
| 75  | 0.25 | 0.13 | 0.63 | -20.35           | -20.37          | 0.025                   | Li <sub>8</sub> Mn <sub>5</sub> CoNi <sub>2</sub> O <sub>16</sub>                | <i>Cm</i>   |
| 76  | 0.25 | 0.25 | 0.50 | -20.06           | -20.10          | 0.011                   | Li <sub>8</sub> Mn <sub>4</sub> Co <sub>2</sub> Ni <sub>2</sub> O <sub>16</sub>  | <i>C2/c</i> |
| 77  | 0.25 | 0.38 | 0.38 | -19.72           | -19.74          | 0.022                   | Li <sub>8</sub> Mn <sub>3</sub> Co <sub>3</sub> Ni <sub>2</sub> O <sub>16</sub>  | <i>P2</i>   |
| 78  | 0.25 | 0.50 | 0.25 | -19.36           | -19.40          | 0.057                   | Li <sub>4</sub> MnCo <sub>2</sub> NiO <sub>8</sub>                               | <i>C2/m</i> |
| 79  | 0.25 | 0.50 | 0.25 | -19.42           | -19.46          | 0.000                   | Li <sub>8</sub> Mn <sub>2</sub> Co <sub>4</sub> Ni <sub>2</sub> O <sub>16</sub>  | <i>P-1</i>  |
| 80  | 0.25 | 0.75 | 0.00 | -18.66           | -18.66          | 0.006                   | Li <sub>4</sub> Co <sub>3</sub> NiO <sub>8</sub>                                 | <i>R-3m</i> |
| 81  | 0.29 | 0.29 | 0.43 | -19.79           | -19.80          | 0.015                   | Li <sub>7</sub> Mn <sub>3</sub> Co <sub>2</sub> Ni <sub>2</sub> O <sub>14</sub>  | <i>P1</i>   |
| 82  | 0.29 | 0.43 | 0.29 | -19.41           | -19.43          | 0.025                   | Li <sub>7</sub> Mn <sub>2</sub> Co <sub>3</sub> Ni <sub>2</sub> O <sub>14</sub>  | <i>P-1</i>  |
| 83  | 0.29 | 0.57 | 0.14 | -18.97           | -18.99          | 0.026                   | Li <sub>7</sub> MnCo <sub>4</sub> Ni <sub>2</sub> O <sub>14</sub>                | <i>C2/m</i> |
| 84  | 0.29 | 0.71 | 0.00 | -18.55           | -18.57          | 0.018                   | Li <sub>7</sub> Co <sub>5</sub> Ni <sub>2</sub> O <sub>14</sub>                  | <i>P-1</i>  |
| 85  | 0.30 | 0.10 | 0.60 | -20.21           | -20.22          | 0.009                   | Li <sub>10</sub> Mn <sub>6</sub> CoNi <sub>3</sub> O <sub>20</sub>               | <i>C2</i>   |
| 86  | 0.30 | 0.40 | 0.30 | -19.41           | -19.39          | 0.023                   | Li <sub>10</sub> Mn <sub>3</sub> Co <sub>4</sub> Ni <sub>3</sub> O <sub>20</sub> | <i>P1</i>   |
| 87  | 0.30 | 0.50 | 0.20 | -19.08           | -19.04          | 0.054                   | Li <sub>10</sub> Mn <sub>2</sub> Co <sub>5</sub> Ni <sub>3</sub> O <sub>20</sub> | <i>C2</i>   |
| 88  | 0.30 | 0.50 | 0.20 | -19.11           | -19.09          | 0.026                   | Li <sub>10</sub> Mn <sub>2</sub> Co <sub>5</sub> Ni <sub>3</sub> O <sub>20</sub> | <i>P1</i>   |
| 89  | 0.30 | 0.50 | 0.20 | -19.12           | -19.12          | 0.014                   | Li <sub>10</sub> Mn <sub>2</sub> Co <sub>5</sub> Ni <sub>3</sub> O <sub>20</sub> | <i>P1</i>   |
| 90  | 0.30 | 0.60 | 0.10 | -18.82           | -18.81          | 0.017                   | Li <sub>10</sub> MnCo <sub>6</sub> Ni <sub>3</sub> O <sub>20</sub>               | <i>P2</i>   |
| 91  | 0.33 | 0.00 | 0.67 | -20.31           | -20.30          | 0.000                   | Li <sub>3</sub> Mn <sub>2</sub> NiO <sub>6</sub>                                 | <i>C2/m</i> |
| 92  | 0.33 | 0.11 | 0.56 | -20.03           | -20.05          | 0.002                   | Li <sub>9</sub> Mn <sub>5</sub> CoNi <sub>3</sub> O <sub>18</sub>                | <i>P1</i>   |
| 93  | 0.33 | 0.22 | 0.44 | -19.74           | -19.74          | 0.000                   | Li <sub>9</sub> Mn <sub>4</sub> Co <sub>2</sub> Ni <sub>3</sub> O <sub>18</sub>  | <i>P-1</i>  |
| 94  | 0.33 | 0.56 | 0.11 | -18.75           | -18.75          | 0.021                   | Li <sub>9</sub> MnCo <sub>5</sub> Ni <sub>3</sub> O <sub>18</sub>                | <i>C2</i>   |
| 95  | 0.33 | 0.56 | 0.11 | -18.76           | -18.76          | 0.018                   | Li <sub>9</sub> MnCo <sub>5</sub> Ni <sub>3</sub> O <sub>18</sub>                | <i>C2</i>   |
| 96  | 0.33 | 0.56 | 0.11 | -18.76           | -18.70          | 0.018                   | Li <sub>9</sub> MnCo <sub>5</sub> Ni <sub>3</sub> O <sub>18</sub>                | <i>Cm</i>   |
| 97  | 0.33 | 0.56 | 0.11 | -18.76           | -18.77          | 0.016                   | Li <sub>9</sub> MnCo <sub>5</sub> Ni <sub>3</sub> O <sub>18</sub>                | <i>C2</i>   |
| 98  | 0.33 | 0.67 | 0.00 | -18.43           | -18.39          | 0.007                   | Li <sub>6</sub> Co <sub>4</sub> Ni <sub>2</sub> O <sub>12</sub>                  | <i>P-1</i>  |
| 99  | 0.38 | 0.00 | 0.63 | -20.11           | -20.12          | 0.000                   | Li <sub>8</sub> Mn <sub>5</sub> Ni <sub>3</sub> O <sub>16</sub>                  | <i>C2/m</i> |
| 100 | 0.38 | 0.25 | 0.38 | -19.39           | -19.37          | 0.075                   | Li <sub>8</sub> Mn <sub>3</sub> Co <sub>2</sub> Ni <sub>3</sub> O <sub>16</sub>  | <i>P1</i>   |
| 101 | 0.38 | 0.25 | 0.38 | -19.45           | -19.41          | 0.015                   | Li <sub>8</sub> Mn <sub>3</sub> Co <sub>2</sub> Ni <sub>3</sub> O <sub>16</sub>  | <i>P1</i>   |
| 102 | 0.38 | 0.38 | 0.25 | -19.05           | -19.07          | 0.034                   | Li <sub>8</sub> Mn <sub>2</sub> Co <sub>3</sub> Ni <sub>3</sub> O <sub>16</sub>  | <i>P-1</i>  |
| 103 | 0.38 | 0.38 | 0.25 | -19.05           | -19.02          | 0.031                   | Li <sub>8</sub> Mn <sub>2</sub> Co <sub>3</sub> Ni <sub>3</sub> O <sub>16</sub>  | <i>C2</i>   |
| 104 | 0.40 | 0.10 | 0.50 | -19.71           | -19.67          | 0.024                   | Li <sub>10</sub> Mn <sub>5</sub> CoNi <sub>4</sub> O <sub>20</sub>               | <i>P1</i>   |
| 105 | 0.40 | 0.10 | 0.50 | -19.73           | -19.72          | 0.003                   | Li <sub>10</sub> Mn <sub>5</sub> CoNi <sub>4</sub> O <sub>20</sub>               | <i>C2</i>   |
| 106 | 0.40 | 0.20 | 0.40 | -19.41           | -19.38          | 0.060                   | Li <sub>10</sub> Mn <sub>4</sub> Co <sub>2</sub> Ni <sub>4</sub> O <sub>20</sub> | <i>P1</i>   |
| 107 | 0.40 | 0.40 | 0.20 | -18.85           | -18.87          | 0.012                   | Li <sub>10</sub> Mn <sub>2</sub> Co <sub>4</sub> Ni <sub>4</sub> O <sub>20</sub> | <i>C2/c</i> |
| 108 | 0.40 | 0.50 | 0.10 | -18.54           | -18.51          | 0.017                   | Li <sub>10</sub> MnCo <sub>5</sub> Ni <sub>4</sub> O <sub>20</sub>               | <i>P-1</i>  |
| 109 | 0.43 | 0.00 | 0.57 | -19.85           | -19.85          | 0.005                   | Li <sub>7</sub> Mn <sub>4</sub> Ni <sub>3</sub> O <sub>14</sub>                  | <i>P-1</i>  |
| 110 | 0.43 | 0.29 | 0.29 | -19.04           | -19.04          | 0.010                   | Li <sub>7</sub> Mn <sub>2</sub> Co <sub>2</sub> Ni <sub>3</sub> O <sub>14</sub>  | <i>P-1</i>  |
| 111 | 0.43 | 0.43 | 0.14 | -18.60           | -18.60          | 0.016                   | Li <sub>7</sub> MnCo <sub>3</sub> Ni <sub>3</sub> O <sub>14</sub>                | <i>P1</i>   |
| 112 | 0.43 | 0.57 | 0.00 | -18.17           | -18.17          | 0.008                   | Li <sub>7</sub> Co <sub>4</sub> Ni <sub>3</sub> O <sub>14</sub>                  | <i>P-1</i>  |
| 113 | 0.43 | 0.57 | 0.00 | -18.17           | -18.18          | 0.004                   | Li <sub>7</sub> Co <sub>4</sub> Ni <sub>3</sub> O <sub>14</sub>                  | <i>C2/m</i> |
| 114 | 0.44 | 0.11 | 0.44 | -19.47           | -19.49          | 0.013                   | Li <sub>9</sub> Mn <sub>4</sub> CoNi <sub>4</sub> O <sub>18</sub>                | <i>C2/m</i> |
| 115 | 0.44 | 0.56 | 0.00 | -17.34           | -17.97          | 0.000                   | Li <sub>9</sub> Co <sub>5</sub> Ni <sub>4</sub> O <sub>18</sub>                  | <i>C2/m</i> |
| 116 | 0.44 | 0.56 | 0.00 | -18.08           | -18.13          | 0.053                   | Li <sub>9</sub> Co <sub>5</sub> Ni <sub>4</sub> O <sub>18</sub>                  | <i>C2/m</i> |
| 117 | 0.50 | 0.00 | 0.50 | -19.47           | -19.48          | 0.029                   | Li <sub>2</sub> MnNiO <sub>4</sub>                                               | <i>C2/m</i> |
| 118 | 0.50 | 0.00 | 0.50 | -19.50           | -19.49          | 0.000                   | Li <sub>8</sub> Mn <sub>4</sub> Ni <sub>4</sub> O <sub>16</sub>                  | <i>C2/c</i> |
| 119 | 0.50 | 0.10 | 0.40 | -19.17           | -19.17          | 0.033                   | Li <sub>10</sub> Mn <sub>4</sub> CoNi <sub>5</sub> O <sub>20</sub>               | <i>P-1</i>  |
| 120 | 0.50 | 0.10 | 0.40 | -19.19           | -19.20          | 0.013                   | Li <sub>10</sub> Mn <sub>4</sub> CoNi <sub>5</sub> O <sub>20</sub>               | <i>C2</i>   |
| 121 | 0.50 | 0.10 | 0.40 | -19.19           | -19.21          | 0.009                   | Li <sub>10</sub> Mn <sub>4</sub> CoNi <sub>5</sub> O <sub>20</sub>               | <i>P1</i>   |
| 122 | 0.50 | 0.10 | 0.40 | -19.20           | -19.18          | 0.000                   | Li <sub>10</sub> Mn <sub>4</sub> CoNi <sub>5</sub> O <sub>20</sub>               | <i>C2</i>   |
| 123 | 0.50 | 0.13 | 0.38 | -19.09           | -19.09          | 0.034                   | Li <sub>8</sub> Mn <sub>3</sub> CoNi <sub>4</sub> O <sub>16</sub>                | <i>P2/m</i> |
| 124 | 0.50 | 0.20 | 0.30 | -18.87           | -18.85          | 0.025                   | Li <sub>10</sub> Mn <sub>3</sub> Co <sub>2</sub> Ni <sub>5</sub> O <sub>20</sub> | <i>P1</i>   |
| 125 | 0.50 | 0.30 | 0.20 | -18.59           | -18.61          | 0.003                   | Li <sub>10</sub> Mn <sub>2</sub> Co <sub>3</sub> Ni <sub>5</sub> O <sub>20</sub> | <i>P1</i>   |
| 126 | 0.50 | 0.40 | 0.10 | -18.27           | -18.26          | 0.015                   | Li <sub>10</sub> MnCo <sub>4</sub> Ni <sub>5</sub> O <sub>20</sub>               | <i>P2</i>   |
| 127 | 0.56 | 0.00 | 0.44 | -19.15           | -19.13          | 0.034                   | Li <sub>9</sub> Mn <sub>4</sub> Ni <sub>5</sub> O <sub>18</sub>                  | <i>P-1</i>  |
| 128 | 0.56 | 0.00 | 0.44 | -19.17           | -19.19          | 0.013                   | Li <sub>9</sub> Mn <sub>4</sub> Ni <sub>5</sub> O <sub>18</sub>                  | <i>P-1</i>  |
| 129 | 0.56 | 0.00 | 0.44 | -19.18           | -19.16          | 0.001                   | Li <sub>9</sub> Mn <sub>4</sub> Ni <sub>5</sub> O <sub>18</sub>                  | <i>C2</i>   |
| 130 | 0.56 | 0.11 | 0.33 | -18.85           | -18.88          | 0.002                   | Li <sub>9</sub> Mn <sub>3</sub> CoNi <sub>5</sub> O <sub>18</sub>                | <i>C2</i>   |



| no  | Ni   | Co   | Mn   | E <sub>DFT</sub> | E <sub>CE</sub> | Dist to GSL<br>meV/f.u. | cell formula                                                                     | space group  |
|-----|------|------|------|------------------|-----------------|-------------------------|----------------------------------------------------------------------------------|--------------|
| 131 | 0.56 | 0.33 | 0.11 | -18.16           | -18.14          | 0.008                   | Li <sub>9</sub> MnCo <sub>3</sub> Ni <sub>5</sub> O <sub>18</sub>                | <i>P1</i>    |
| 132 | 0.57 | 0.00 | 0.43 | -19.09           | -19.06          | 0.000                   | Li <sub>7</sub> Mn <sub>3</sub> Ni <sub>4</sub> O <sub>14</sub>                  | <i>C2/m</i>  |
| 133 | 0.57 | 0.43 | 0.00 | -17.77           | -17.73          | 0.009                   | Li <sub>7</sub> Co <sub>3</sub> Ni <sub>4</sub> O <sub>14</sub>                  | <i>C2/m</i>  |
| 134 | 0.57 | 0.43 | 0.00 | -17.78           | -17.75          | 0.000                   | Li <sub>7</sub> Co <sub>3</sub> Ni <sub>4</sub> O <sub>14</sub>                  | <i>P-1</i>   |
| 135 | 0.60 | 0.10 | 0.30 | -18.63           | -18.65          | 0.000                   | Li <sub>10</sub> Mn <sub>3</sub> CoNi <sub>6</sub> O <sub>20</sub>               | <i>C2/m</i>  |
| 136 | 0.60 | 0.20 | 0.20 | -18.30           | -18.30          | 0.000                   | Li <sub>10</sub> Mn <sub>2</sub> Co <sub>2</sub> Ni <sub>6</sub> O <sub>20</sub> | <i>C2/m</i>  |
| 137 | 0.60 | 0.30 | 0.10 | -18.01           | -18.00          | 0.004                   | Li <sub>10</sub> MnCo <sub>3</sub> Ni <sub>6</sub> O <sub>20</sub>               | <i>P-1</i>   |
| 138 | 0.63 | 0.00 | 0.38 | -18.78           | -18.79          | 0.005                   | Li <sub>8</sub> Mn <sub>3</sub> Ni <sub>5</sub> O <sub>16</sub>                  | <i>P2/m</i>  |
| 139 | 0.63 | 0.38 | 0.00 | -17.62           | -17.60          | 0.011                   | Li <sub>8</sub> Co <sub>3</sub> Ni <sub>5</sub> O <sub>16</sub>                  | <i>P2/m</i>  |
| 140 | 0.63 | 0.38 | 0.00 | -17.63           | -17.60          | 0.009                   | Li <sub>8</sub> Co <sub>3</sub> Ni <sub>5</sub> O <sub>16</sub>                  | <i>P2</i>    |
| 141 | 0.63 | 0.38 | 0.00 | -17.63           | -17.62          | 0.008                   | Li <sub>8</sub> Co <sub>3</sub> Ni <sub>5</sub> O <sub>16</sub>                  | <i>C2/m</i>  |
| 142 | 0.67 | 0.17 | 0.17 | -18.00           | -17.94          | 0.029                   | Li <sub>6</sub> MnCoNi <sub>4</sub> O <sub>12</sub>                              | <i>P-1</i>   |
| 143 | 0.67 | 0.17 | 0.17 | -18.01           | -18.01          | 0.022                   | Li <sub>6</sub> MnCoNi <sub>4</sub> O <sub>12</sub>                              | <i>P-1</i>   |
| 144 | 0.70 | 0.10 | 0.20 | -18.04           | -18.08          | 0.003                   | Li <sub>10</sub> Mn <sub>2</sub> CoNi <sub>7</sub> O <sub>20</sub>               | <i>P2/m</i>  |
| 145 | 0.70 | 0.20 | 0.10 | -17.72           | -17.72          | 0.016                   | Li <sub>10</sub> MnCo <sub>2</sub> Ni <sub>7</sub> O <sub>20</sub>               | <i>P1</i>    |
| 146 | 0.71 | 0.00 | 0.29 | -18.26           | -18.26          | 0.006                   | Li <sub>7</sub> Mn <sub>2</sub> Ni <sub>5</sub> O <sub>14</sub>                  | <i>P-1</i>   |
| 147 | 0.71 | 0.00 | 0.29 | -18.27           | -18.27          | 0.000                   | Li <sub>7</sub> Mn <sub>2</sub> Ni <sub>5</sub> O <sub>14</sub>                  | <i>P-1</i>   |
| 148 | 0.71 | 0.14 | 0.14 | -17.82           | -17.85          | 0.008                   | Li <sub>7</sub> MnCoNi <sub>5</sub> O <sub>14</sub>                              | <i>C2</i>    |
| 149 | 0.71 | 0.14 | 0.14 | -17.82           | -17.82          | 0.006                   | Li <sub>7</sub> MnCoNi <sub>5</sub> O <sub>14</sub>                              | <i>P1</i>    |
| 150 | 0.71 | 0.14 | 0.14 | -17.82           | -17.83          | 0.005                   | Li <sub>7</sub> MnCoNi <sub>5</sub> O <sub>14</sub>                              | <i>P1</i>    |
| 151 | 0.75 | 0.00 | 0.25 | -18.05           | -18.03          | 0.010                   | Li <sub>4</sub> MnNi <sub>3</sub> O <sub>8</sub>                                 | <i>P2/m</i>  |
| 152 | 0.75 | 0.00 | 0.25 | -18.05           | -18.06          | 0.005                   | Li <sub>4</sub> MnNi <sub>3</sub> O <sub>8</sub>                                 | <i>C2/m</i>  |
| 153 | 0.75 | 0.13 | 0.13 | -17.67           | -17.69          | 0.008                   | Li <sub>8</sub> MnCoNi <sub>6</sub> O <sub>16</sub>                              | <i>C2/m</i>  |
| 154 | 0.75 | 0.25 | 0.00 | -17.29           | -17.29          | 0.000                   | Li <sub>4</sub> CoNi <sub>3</sub> O <sub>8</sub>                                 | <i>P2/m</i>  |
| 155 | 0.78 | 0.00 | 0.22 | -17.89           | -17.88          | 0.009                   | Li <sub>9</sub> Mn <sub>2</sub> Ni <sub>7</sub> O <sub>18</sub>                  | <i>P-1</i>   |
| 156 | 0.78 | 0.00 | 0.22 | -17.89           | -17.87          | 0.008                   | Li <sub>9</sub> Mn <sub>2</sub> Ni <sub>7</sub> O <sub>18</sub>                  | <i>P-1</i>   |
| 157 | 0.78 | 0.00 | 0.22 | -17.89           | -17.89          | 0.003                   | Li <sub>9</sub> Mn <sub>2</sub> Ni <sub>7</sub> O <sub>18</sub>                  | <i>P-1</i>   |
| 158 | 0.78 | 0.22 | 0.00 | -17.20           | -17.13          | 0.017                   | Li <sub>9</sub> Co <sub>2</sub> Ni <sub>7</sub> O <sub>18</sub>                  | <i>R-3</i>   |
| 159 | 0.78 | 0.22 | 0.00 | -17.21           | -17.18          | 0.004                   | Li <sub>9</sub> Co <sub>2</sub> Ni <sub>7</sub> O <sub>18</sub>                  | <i>P-1</i>   |
| 160 | 0.80 | 0.10 | 0.10 | -17.45           | -17.42          | 0.014                   | Li <sub>10</sub> MnCoNi <sub>8</sub> O <sub>20</sub>                             | <i>P1</i>    |
| 161 | 0.80 | 0.10 | 0.10 | -17.45           | -17.45          | 0.008                   | Li <sub>10</sub> MnCoNi <sub>8</sub> O <sub>20</sub>                             | <i>P-1</i>   |
| 162 | 0.80 | 0.10 | 0.10 | -17.45           | -17.45          | 0.000                   | Li <sub>10</sub> MnCoNi <sub>8</sub> O <sub>20</sub>                             | <i>P2/m</i>  |
| 163 | 0.83 | 0.00 | 0.17 | -17.54           | -17.55          | 0.036                   | Li <sub>6</sub> MnNi <sub>5</sub> O <sub>12</sub>                                | <i>C2/m</i>  |
| 164 | 0.83 | 0.00 | 0.17 | -17.57           | -17.60          | 0.000                   | Li <sub>6</sub> MnNi <sub>5</sub> O <sub>12</sub>                                | <i>P-1</i>   |
| 165 | 0.86 | 0.00 | 0.14 | -17.42           | -17.46          | 0.015                   | Li <sub>7</sub> MnNi <sub>6</sub> O <sub>14</sub>                                | <i>P-1</i>   |
| 166 | 0.86 | 0.14 | 0.00 | -16.99           | -16.98          | 0.005                   | Li <sub>7</sub> CoNi <sub>6</sub> O <sub>14</sub>                                | <i>P-1</i>   |
| 167 | 0.86 | 0.14 | 0.00 | -16.99           | -16.98          | 0.003                   | Li <sub>7</sub> CoNi <sub>6</sub> O <sub>14</sub>                                | <i>P-1</i>   |
| 168 | 0.89 | 0.00 | 0.11 | -17.23           | -17.22          | 0.008                   | Li <sub>9</sub> MnNi <sub>8</sub> O <sub>18</sub>                                | <i>R-3</i>   |
| 169 | 0.89 | 0.11 | 0.00 | -16.87           | -16.84          | 0.028                   | Li <sub>9</sub> CoNi <sub>8</sub> O <sub>18</sub>                                | <i>P-3m1</i> |
| 170 | 0.90 | 0.00 | 0.10 | -17.17           | -17.19          | 0.002                   | Li <sub>10</sub> MnNi <sub>9</sub> O <sub>20</sub>                               | <i>P-1</i>   |
| 171 | 0.90 | 0.10 | 0.00 | -16.87           | -16.86          | 0.000                   | Li <sub>10</sub> CoNi <sub>9</sub> O <sub>20</sub>                               | <i>P-1</i>   |
| 172 | 1.00 | 0.00 | 0.00 | -16.58           | -16.58          | 0.000                   | LiNiO <sub>2</sub>                                                               | <i>R-3m</i>  |

Table S3 Training structures for the Lithium sublattice

| no | Li  | $E_{\text{DFT}}$ | $E_{\text{CE}}$ | Dist to GSL<br>meV/f.u. | cell formula                                        | space group |
|----|-----|------------------|-----------------|-------------------------|-----------------------------------------------------|-------------|
| 1  | 0   | -19.74           | -19.74          | 0                       | $\text{MnCoNi}_8\text{O}_{20}\text{H}_{10}$         | $P2/m$      |
| 2  | 0.1 | -20.08           | -20.08          | 0.028                   | $\text{LiMnCoNi}_8\text{O}_{20}\text{H}_9$          | $P2/m$      |
| 3  | 0.1 | -20.09           | -20.09          | 0.023                   | $\text{LiMnCoNi}_8\text{O}_{20}\text{H}_9$          | $P2/m$      |
| 4  | 0.1 | -20.11           | -20.11          | 0.002                   | $\text{LiMnCoNi}_8\text{O}_{20}\text{H}_9$          | $P2$        |
| 5  | 0.2 | -20.44           | -20.44          | 0.04                    | $\text{Li}_2\text{MnCoNi}_8\text{O}_{20}\text{H}_8$ | $P2$        |
| 6  | 0.2 | -20.45           | -20.45          | 0.026                   | $\text{Li}_2\text{MnCoNi}_8\text{O}_{20}\text{H}_8$ | $P2/m$      |
| 7  | 0.2 | -20.48           | -20.48          | 0                       | $\text{Li}_2\text{MnCoNi}_8\text{O}_{20}\text{H}_8$ | $P2/m$      |
| 8  | 0.3 | -20.77           | -20.77          | 0.055                   | $\text{Li}_3\text{MnCoNi}_8\text{O}_{20}\text{H}_7$ | $P2$        |
| 9  | 0.3 | -20.8            | -20.8           | 0.028                   | $\text{Li}_3\text{MnCoNi}_8\text{O}_{20}\text{H}_7$ | $P2/m$      |
| 10 | 0.3 | -20.81           | -20.81          | 0.015                   | $\text{Li}_3\text{MnCoNi}_8\text{O}_{20}\text{H}_7$ | $P2$        |
| 11 | 0.3 | -20.82           | -20.82          | 0.006                   | $\text{Li}_3\text{MnCoNi}_8\text{O}_{20}\text{H}_7$ | $P2/m$      |
| 12 | 0.3 | -20.82           | -20.82          | 0.001                   | $\text{Li}_3\text{MnCoNi}_8\text{O}_{20}\text{H}_7$ | $P2$        |
| 13 | 0.4 | -21.03           | -21.03          | 0                       | $\text{Li}_4\text{MnCoNi}_8\text{O}_{20}\text{H}_6$ | $P2$        |
| 14 | 0.4 | -21.06           | -21.06          | 0.109                   | $\text{Li}_4\text{MnCoNi}_8\text{O}_{20}\text{H}_6$ | $P2$        |
| 15 | 0.4 | -21.09           | -21.09          | 0.082                   | $\text{Li}_4\text{MnCoNi}_8\text{O}_{20}\text{H}_6$ | $P2$        |
| 16 | 0.4 | -21.09           | -21.09          | 0.081                   | $\text{Li}_4\text{MnCoNi}_8\text{O}_{20}\text{H}_6$ | $P2$        |
| 17 | 0.4 | -21.16           | -21.17          | 0.006                   | $\text{Li}_4\text{MnCoNi}_8\text{O}_{20}\text{H}_6$ | $P2$        |
| 18 | 0.4 | -21.17           | -21.17          | 0                       | $\text{Li}_4\text{MnCoNi}_8\text{O}_{20}\text{H}_6$ | $P2/m$      |
| 19 | 0.5 | -21.42           | -21.42          | 0.096                   | $\text{Li}_5\text{MnCoNi}_8\text{O}_{20}\text{H}_5$ | $P2$        |
| 20 | 0.5 | -21.48           | -21.48          | 0.035                   | $\text{Li}_5\text{MnCoNi}_8\text{O}_{20}\text{H}_5$ | $P2$        |
| 21 | 0.5 | -21.51           | -21.51          | 0                       | $\text{Li}_5\text{MnCoNi}_8\text{O}_{20}\text{H}_5$ | $P2/m$      |
| 22 | 0.6 | -21.71           | -21.71          | 0.138                   | $\text{Li}_6\text{MnCoNi}_8\text{O}_{20}\text{H}_4$ | $P2$        |
| 23 | 0.6 | -21.73           | -21.72          | 0.125                   | $\text{Li}_6\text{MnCoNi}_8\text{O}_{20}\text{H}_4$ | $P2$        |
| 24 | 0.6 | -21.77           | -21.76          | 0.082                   | $\text{Li}_6\text{MnCoNi}_8\text{O}_{20}\text{H}_4$ | $P2$        |
| 25 | 0.6 | -21.78           | -21.78          | 0.066                   | $\text{Li}_6\text{MnCoNi}_8\text{O}_{20}\text{H}_4$ | $P2/m$      |
| 26 | 0.6 | -21.81           | -21.81          | 0.037                   | $\text{Li}_6\text{MnCoNi}_8\text{O}_{20}\text{H}_4$ | $P2$        |
| 27 | 0.6 | -21.85           | -21.85          | 0                       | $\text{Li}_6\text{MnCoNi}_8\text{O}_{20}\text{H}_4$ | $P2/m$      |
| 28 | 0.7 | -22.04           | -22.04          | 0.104                   | $\text{Li}_7\text{MnCoNi}_8\text{O}_{20}\text{H}_3$ | $P2$        |
| 29 | 0.7 | -22.1            | -22.11          | 0.039                   | $\text{Li}_7\text{MnCoNi}_8\text{O}_{20}\text{H}_3$ | $P2/m$      |
| 30 | 0.7 | -22.11           | -22.11          | 0.034                   | $\text{Li}_7\text{MnCoNi}_8\text{O}_{20}\text{H}_3$ | $P2/m$      |
| 31 | 0.7 | -22.14           | -22.14          | 0.003                   | $\text{Li}_7\text{MnCoNi}_8\text{O}_{20}\text{H}_3$ | $P2$        |
| 32 | 0.7 | -22.14           | -22.14          | 0.001                   | $\text{Li}_7\text{MnCoNi}_8\text{O}_{20}\text{H}_3$ | $P2$        |
| 33 | 0.8 | -22.4            | -22.4           | 0.03                    | $\text{Li}_8\text{MnCoNi}_8\text{O}_{20}\text{H}_2$ | $P2$        |
| 34 | 0.8 | -22.43           | -22.43          | 0.005                   | $\text{Li}_8\text{MnCoNi}_8\text{O}_{20}\text{H}_2$ | $P2/m$      |
| 35 | 0.8 | -22.43           | -22.43          | 0                       | $\text{Li}_8\text{MnCoNi}_8\text{O}_{20}\text{H}_2$ | $P2$        |
| 36 | 0.8 | -22.43           | -22.44          | 0                       | $\text{Li}_8\text{MnCoNi}_8\text{O}_{20}\text{H}_2$ | $P2$        |
| 37 | 0.9 | -22.7            | -22.7           | 0.03                    | $\text{Li}_9\text{MnCoNi}_8\text{O}_{20}\text{H}$   | $P2/m$      |
| 38 | 0.9 | -22.73           | -22.73          | 0                       | $\text{Li}_9\text{MnCoNi}_8\text{O}_{20}\text{H}$   | $P2$        |
| 39 | 1   | -23.02           | -23.02          | 0                       | $\text{Li}_{10}\text{MnCoNi}_8\text{O}_{20}$        | $P2/m$      |
